# Supplementary material for: Characterization of Dimeric Vanadium Uptake and Species in Nafion™ and Novel Membranes from Vanadium Redox Flow Batteries Electrolytes
Source: MDPI journal article supplement (doi:10.3390/membranes11080576), 2021-07-29
Supplement: s1 [file s1]

Supplementary Materials:

# Characterization of Dimeric Vanadium Uptake and Species in Nafion™ and Novel Membranes from Vanadium Redox Flow Batteries Electrolytes

Christian Lutz <sup>1</sup>, Michael Breuckmann <sup>2</sup>, Sven Hampel <sup>1</sup>, Martin Kreyenschmidt <sup>2</sup>, Xi Ke <sup>3</sup>, Sabine Beuermann <sup>3</sup>, Katharina Schafner <sup>4,5</sup>, Thomas Turek <sup>4,5</sup>, Ulrich Kunz <sup>4,5</sup>, Ana Guilherme Buzanich <sup>6</sup>, Martin Radtke <sup>6</sup> and Ursula E. A. Fittschen <sup>1,\*</sup>

<sup>1</sup> Clausthal University of Technology, Institute of Inorganic and Analytical Chemistry, Arnold-Sommerfeld-Str. 4, 38678 Clausthal-Zellerfeld, Germany; christian.lutz@tu-clausthal.de (C.L.), sven.hampel@tu-clausthal.de (S.H.)

<sup>2</sup> University of Applied Science Münster, Department of Chemical Engineering, Stegerwaldstr. 39, 48565 Steinfurt, Germany; michael.breuckmann@fh-muenster.de (M.B.), martin.kreyenschmidt@fh-muenster.de (M.K.)

<sup>3</sup> Clausthal University of Technology, Institute of Technical Chemistry, Arnold-Sommerfeld-Str. 4, 38678 Clausthal-Zellerfeld, Germany; xi.ke@outlook.de (X.K.), sabine.beuermann@tu-clausthal.de (S.B.)

<sup>4</sup> Clausthal University of Technology, Institute of Chemical and Electrochemical Process Engineering, Leibnizstr. 17, 38678 Clausthal-Zellerfeld, Germany

<sup>5</sup> Forschungszentrum Energiespeichertechnologien, Am Stollen 19A, 38640 Goslar, Germany; katharina.schafner@alumni.tu-clausthal.de (K.S.); turek@icvt.tu-clausthal.de (T.T.); kunz@icvt.tu-clausthal.de (U.K.)

<sup>6</sup> Federal Institute for Materials Research and Testing (BAM), Richard-Willstaetter-Str. 11, 12489 Berlin, Germany; ana.buzanich@bam.de (A.G.B.); martin.radtke@bam.de (M.R.)

\* Correspondence: ursula.fittschen@tu-clausthal.de (U.E.A.F.); Tel.: +49 (0) 5323 72 2205

In Figure S1, the UV/VIS spectra of 1.6 M V(II), 1.6 M V(III), 1.6 M V(IV), 1.6 M V(IV/V), and 1.6 M V(V) electrolyte are shown. The V(II) and V(III) electrolyte were analyzed using a 1 mm cuvette and the V(IV), V(IV/V), and V(V) electrolyte using a 0.1 mm flow through cuvette. The data are in agreement with the literature [1,2].

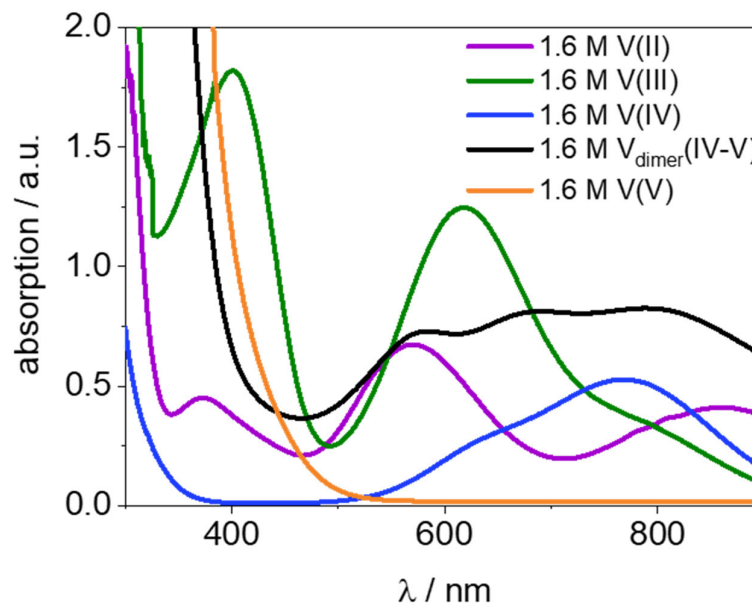

**Figure S1.** UV/VIS spectra of 1.6 M V(II), 1.6 M V(III), 1.6 M V(IV), 1.6 M V(IV/V), and 1.6 M V(V) electrolyte.

In Figure S2 to S6, UV/VIS spectra of Nafion<sup>TM</sup> hydrated with either V(II), V(III), V(IV), V(IV/V), and V(V) electrolyte with the concentrations 0.8 M, 0.4 M and 0.16 M are shown. As discussed in the result section, UV/VIS spectra of Nafion<sup>TM</sup> hydrated with lower concentrations of vanadium provide good data for the speciation.

The same measurements were applied to the PVDF-based membrane. It was evident that the PVDF-based membrane hydrated in 0.8 M vanadium electrolyte provides not evaluable spectra anymore. Considering the uptake of the PVDF-based membrane compared to Nafion<sup>TM</sup> must be significantly lower.

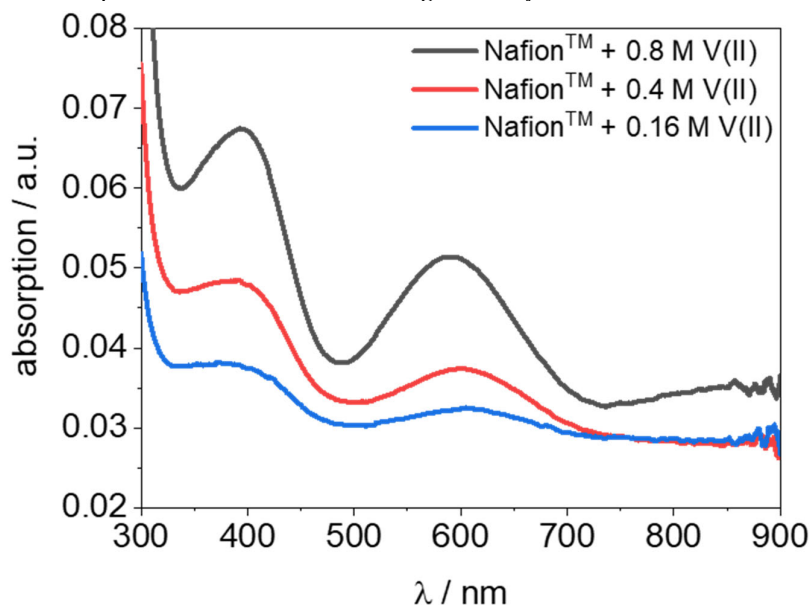

**Figure S2.** UV/VIS spectra of Nafion<sup>TM</sup> hydrated with 0.8 M, 0.4 M, and 0.16 M V(II) electrolyte.

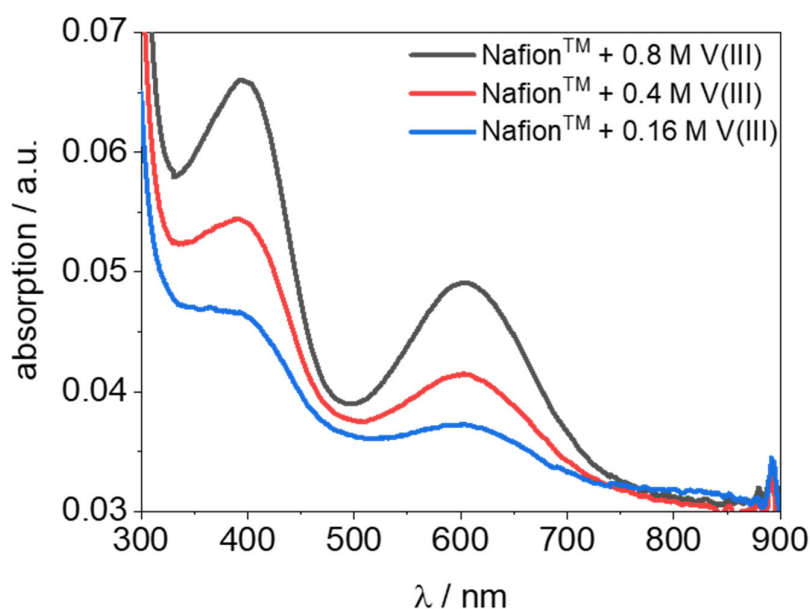

**Figure S3.** UV/VIS spectra of Nafion<sup>TM</sup> hydrated with 0.8 M, 0.4 M, and 0.16 M V(III) electrolyte.

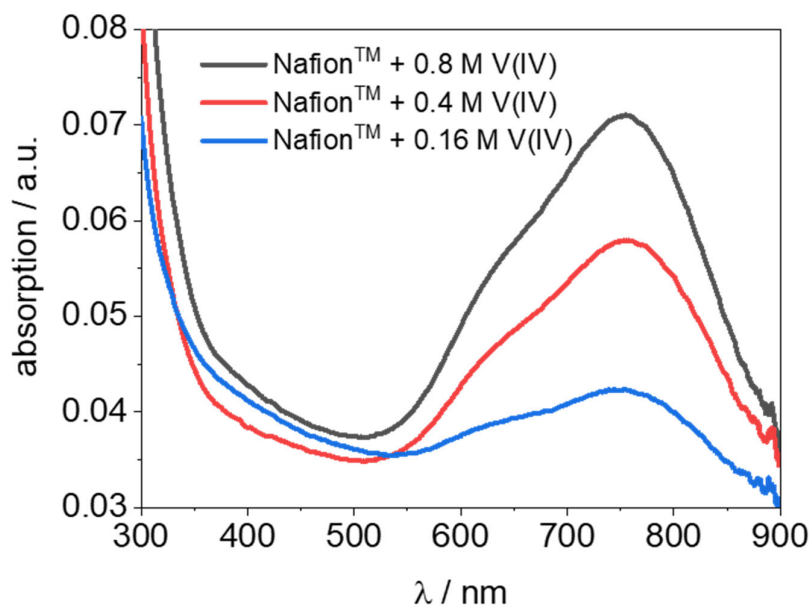

**Figure S4.** UV/VIS spectra of Nafion<sup>TM</sup> hydrated with 0.8 M, 0.4 M, and 0.16 M V(IV) electrolyte.

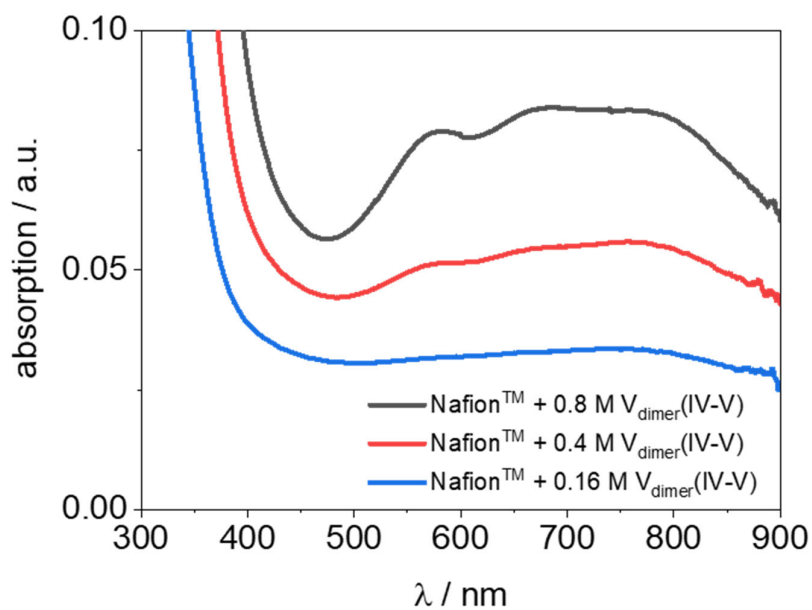

**Figure S5.** UV/VIS spectra of Nafion<sup>TM</sup> hydrated with 0.8 M, 0.4 M, and 0.16 M V(IV)/V electrolyte.

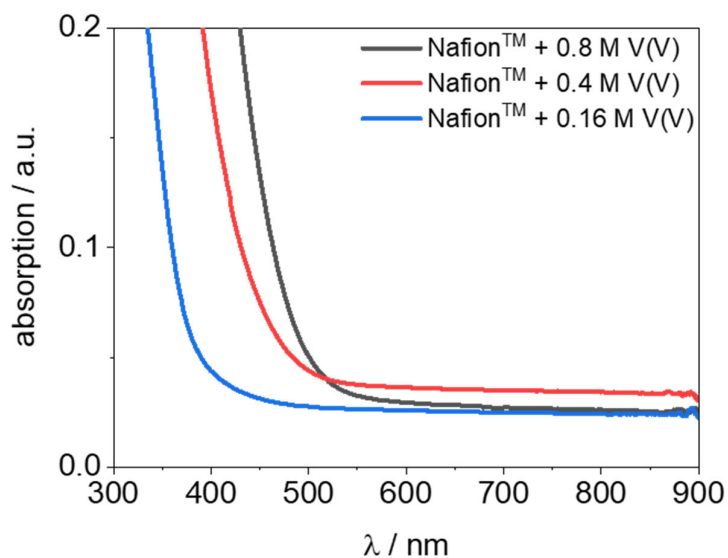

**Figure S6.** UV/VIS spectra of Nafion<sup>TM</sup> hydrated with 0.8 M, 0.4 M, and 0.16 M V(V) electrolyte.

In Figure S7, a photograph of V(IV/V) electrolyte is shown with the concentrations 1.6 M (a) and 0.1 M (b).

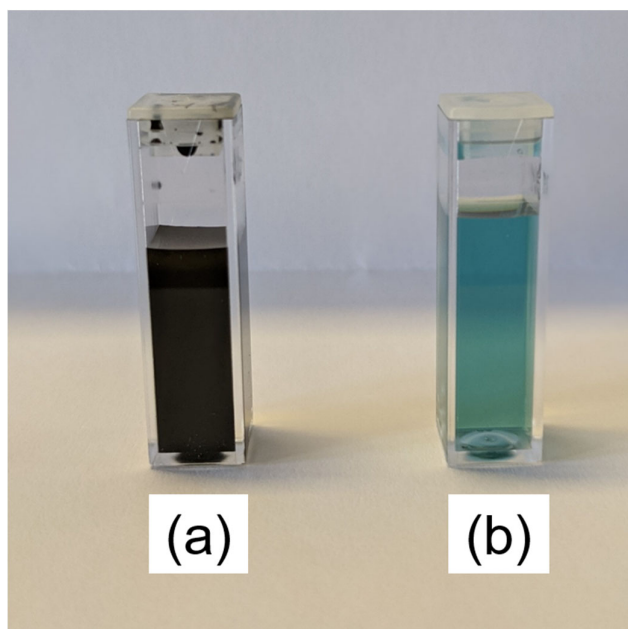

**Figure S7.** Photograph of V(IV/V) electrolyte with the concentrations 1.6 M (a) and 0.1 M (b).

## References

1. Buckley, D.N.; Gao, X.; Lynch, R.P.; Quill, N.; Leahy, M.J. Towards Optical Monitoring of Vanadium Redox Flow Batteries (VRFBs): An Investigation of the Underlying Spectroscopy. *J. Electrochem. Soc.* **2014**, *161*, A524–A534, doi:10.1149/2.023404jes.
2. Petchsingh, C.; Quill, N.; Joyce, J.T.; Eidhin, D.N.; Oboroceanu, D.; Lenihan, C.; Gao, X.; Lynch, R.P.; Buckley, D.N. Spectroscopic Measurement of State of Charge in Vanadium Flow Batteries with an Analytical Model of V<sup>IV</sup>-V<sup>V</sup> Absorbance. *J. Electrochem. Soc.* **2016**, *163*, A5068–A5083, doi:10.1149/2.0091601jes.
